# Supplementary material for: Differential behavioral aging trajectories according to body size, expected lifespan, and head shape in dogs
Source: Springer Nature journal article supplement (doi:10.1007/s11357-023-00945-9), 2023-09-23

## Supplementary Information 2

**Title:** When do dogs start to age? Behavioral and cognitive aging are linked to expected lifespan, body size, head shape, and purebred status in dogs

**Journal:** GeroScience

**Authors:** Borbála Turcsán\*, Enikő Kubinyi

\* MTA-ELTE Lendület “Momentum” Companion Animal Research Group, Department of Ethology, Eötvös Loránd University, Budapest, Hungary, borbala.turcsan@gmail.com

**Fig S1** Location of the breakpoint in the six raw behavioral characteristics that made up the Liveliness-Trainability factor. The vertical dashed line indicates the location of the breakpoint of the Liveliness-Trainability factor, the bars represent its 95% confidence interval

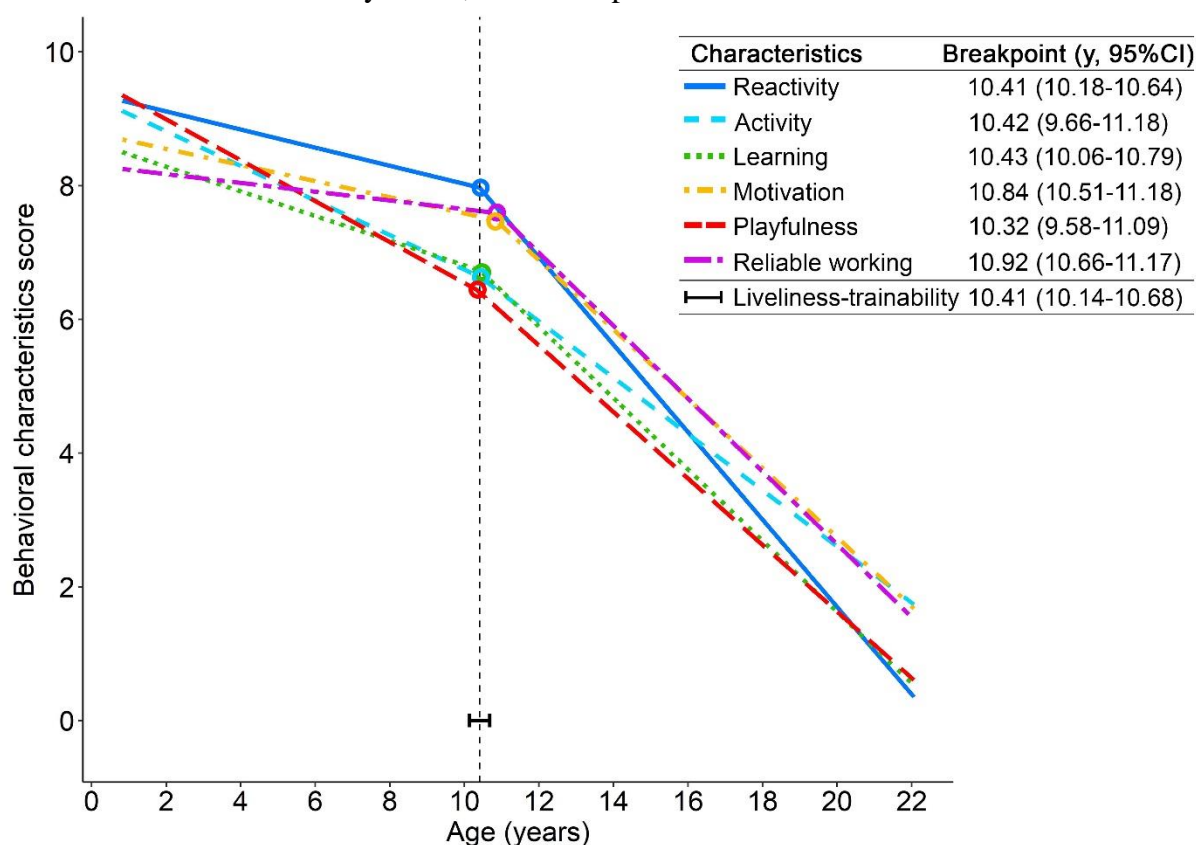

Supplement: MOESM1 [file 11357_2023_945_MOESM1_ESM.pdf]
